# Supplementary material for: Comparing Patterns of Natural Selection across Species Using Selective Signatures
Source: PLOS journal article supplement (doi:10.1371/journal.pgen.0040023), 2008-02-01
Supplement: S2 (10.1371/journal.pgen.0040023.s002) [file journal.pgen.0040023.s002]

**Table S2a. Taxonomy IDs of species used in this study.**

| <b>Taxonomy ID</b> | <b>Species Name</b>                                 |
|--------------------|-----------------------------------------------------|
| 107806             | <i>Buchnera aphidicola</i> str. APS                 |
| 224915             | <i>Buchnera aphidicola</i> str. Bp                  |
| 198804             | <i>Buchnera aphidicola</i> str. Sg                  |
| 203907             | <i>Candidatus Blochmannia floridanus</i>            |
| 167879             | <i>Colwellia psychrerythraea</i> 34h                |
| 227377             | <i>Coxiella burnetii</i> RSA                        |
| 218491             | <i>Erwinia carotovora</i> SCRI1043                  |
| 83333              | <i>Escherichia coli</i> K12                         |
| 233412             | <i>Haemophilus ducreyi</i> 35000HP                  |
| 71421              | <i>Haemophilus influenzae</i> Rd KW20               |
| 283942             | <i>Idiomarina loihiensis</i> L2TR                   |
| 221988             | <i>Mannheimia succiniciproducens</i> MBEL55E        |
| 747                | <i>Pasteurella multocida</i>                        |
| 298386             | <i>Photobacterium profundum</i> SS9                 |
| 243265             | <i>Photorhabdus luminescens</i> TTO1                |
| 208964             | <i>Pseudomonas aeruginosa</i> PAO1                  |
| 220664             | <i>Pseudomonas fluorescens</i> Pf-5                 |
| 160488             | <i>Pseudomonas putida</i> KT2440                    |
| 223283             | <i>Pseudomonas syringae</i>                         |
| 99287              | <i>Salmonella typhimurium</i> LT2                   |
| 211586             | <i>Shewanella oneidensis</i> MR-1                   |
| 666                | <i>Vibrio cholerae</i>                              |
| 312309             | <i>Vibrio fischeri</i> ES114                        |
| 223926             | <i>Vibrio parahaemolyticus</i> RIMD2210633          |
| 216895             | <i>Vibrio vulnificus</i> CMCP6                      |
| 36870              | <i>Wigglesworthia glossinidia</i>                   |
| 190485             | <i>Xanthomonas campestris</i> ATCC33913             |
| 291331             | <i>Xanthomonas oryzae</i> pv. <i>oryzae</i> KACC103 |
| 160492             | <i>Xylella fastidiosa</i> 9a5c                      |
| 273123             | <i>Yersinia pestis</i> IP32953                      |

**Table S2b. Taxonomy IDs of strains used in McDonald-Kreitman tests.**

| <b>Taxonomy ID</b> | <b>Species Name</b>                        |
|--------------------|--------------------------------------------|
| 358709             | <i>Escherichia coli</i> 101-1              |
| 362663             | <i>Escherichia coli</i> 536                |
| 405955             | <i>Escherichia coli</i> APEC O1            |
| 37762              | <i>Escherichia coli</i> B                  |
| 344601             | <i>Escherichia coli</i> B171               |
| 340184             | <i>Escherichia coli</i> B7A                |
| 199310             | <i>Escherichia coli</i> CFT073             |
| 340186             | <i>Escherichia coli</i> E110019            |
| 340185             | <i>Escherichia coli</i> E22                |
| 331111             | <i>Escherichia coli</i> E24377A            |
| 340197             | <i>Escherichia coli</i> F11                |
| 331112             | <i>Escherichia coli</i> HS                 |
| 83333              | <i>Escherichia coli</i> K12                |
| 155864             | <i>Escherichia coli</i> O157:H7 EDL933     |
| 386585             | <i>Escherichia coli</i> O157:H7 str. Sakai |
| 364106             | <i>Escherichia coli</i> UTI89              |
| 316407             | <i>Escherichia coli</i> W3110              |
| 344609             | <i>Shigella boydii</i> BS512               |
| 300268             | <i>Shigella boydii</i> Sb227               |
| 300267             | <i>Shigella dysenteriae</i> Sd197          |
| 198215             | <i>Shigella flexneri</i> 2a str. 2457T     |
| 198214             | <i>Shigella flexneri</i> 2a str. 301       |
| 373384             | <i>Shigella flexneri</i> 5 str. 8401       |
| 300269             | <i>Shigella sonnei</i> Ss046               |
|                    | <b>outgroup:</b>                           |
| 99287              | <i>Salmonella typhimurium</i> LT2          |
