# Supplementary figures and images for: Comparing Patterns of Natural Selection across Species Using Selective Signatures
Source: PLOS journal article supplement (doi:10.1371/journal.pgen.0040023), 2008-02-01

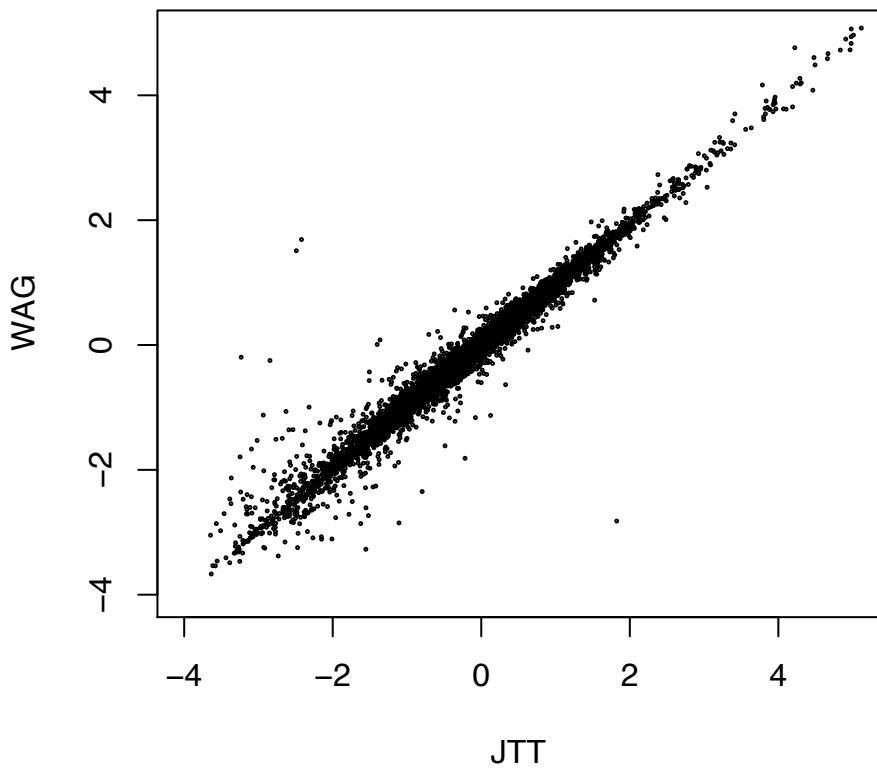

Supplement: S7 (10.1371/journal.pgen.0040023.s007) [file journal.pgen.0040023.s007]
